# Supplementary material for: Coumarin Exhibits Broad-Spectrum Antibiofilm and Antiquorum Sensing Activity against Gram-Negative Bacteria: In Vitro and In Silico Investigation
Source: PubMed Central journal article supplement — ACS Omega. 2021 Jul 15;6(29):18823–35. doi: 10.1021/acsomega.1c02046 (PMC8320077; doi:10.1021/acsomega.1c02046), 2021-07-15
Supplement: ao1c02046_si_001.pdf [file ao1c02046_si_001.pdf]

# **Coumarin exhibits broad-spectrum antibiofilm and antiquorum sensing activity against Gram-negative bacteria: *In vitro* and *in silico* investigation**

**Faizan Abul Qais <sup>a</sup>, Mohammad Shavez Khan <sup>a</sup>, Iqbal Ahmad <sup>a\*</sup>, Fohad Mabood Husain <sup>b</sup>, Rais Ahmad Khan <sup>c</sup>, Iftekhhar Hassan <sup>d</sup>, Syed Ali Shahzad <sup>b</sup>, Walaa AlHarbi <sup>e</sup>**

<sup>a</sup> *Department of Agricultural Microbiology, Faculty of Agricultural Sciences, Aligarh Muslim University, Aligarh, UP-202002, India.*

<sup>b</sup> *Department of Food Science and Nutrition, King Saud University, Riyadh-11451, KSA.*

<sup>c</sup> *Department of Chemistry, King Saud University, Riyadh-11451, KSA.*

<sup>d</sup> *Department of Zoology, King Saud University, Riyadh-11451, KSA.*

<sup>e</sup> *Department of Chemistry, Faculty of Science, King Khalid University, P.O. Box-9004, Abha 62529, KSA.*

## Supplementary Figures

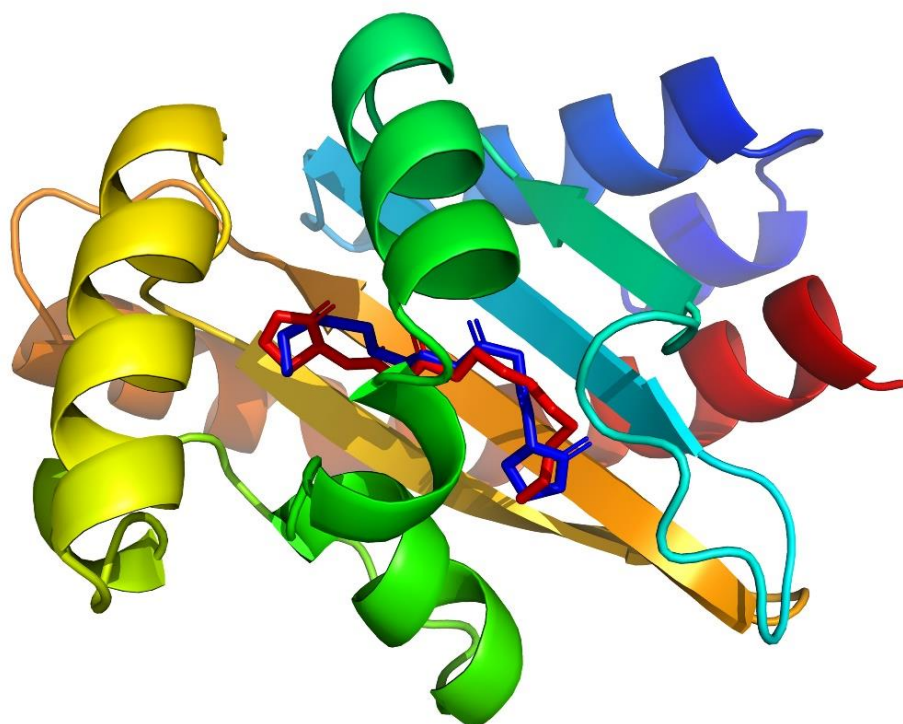

**Figure S1.** Comparison between crystal structures and docked conformations of N-3-oxo-dodecanoyl-l-homoserine lactone-LasR complex. Stick model of ligand in blue is the crystal structures conformation and stick model of ligand in red is the docked-conformation.

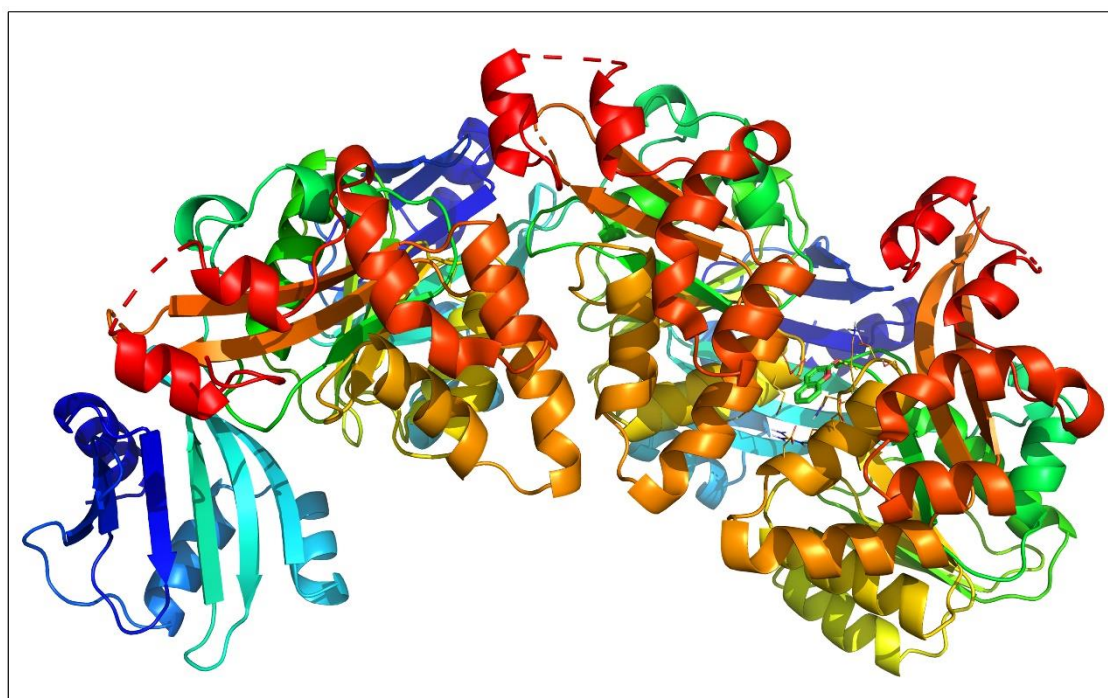

**Figure S2.** Molecular docked complex of coumarin with PiT (3JVV).

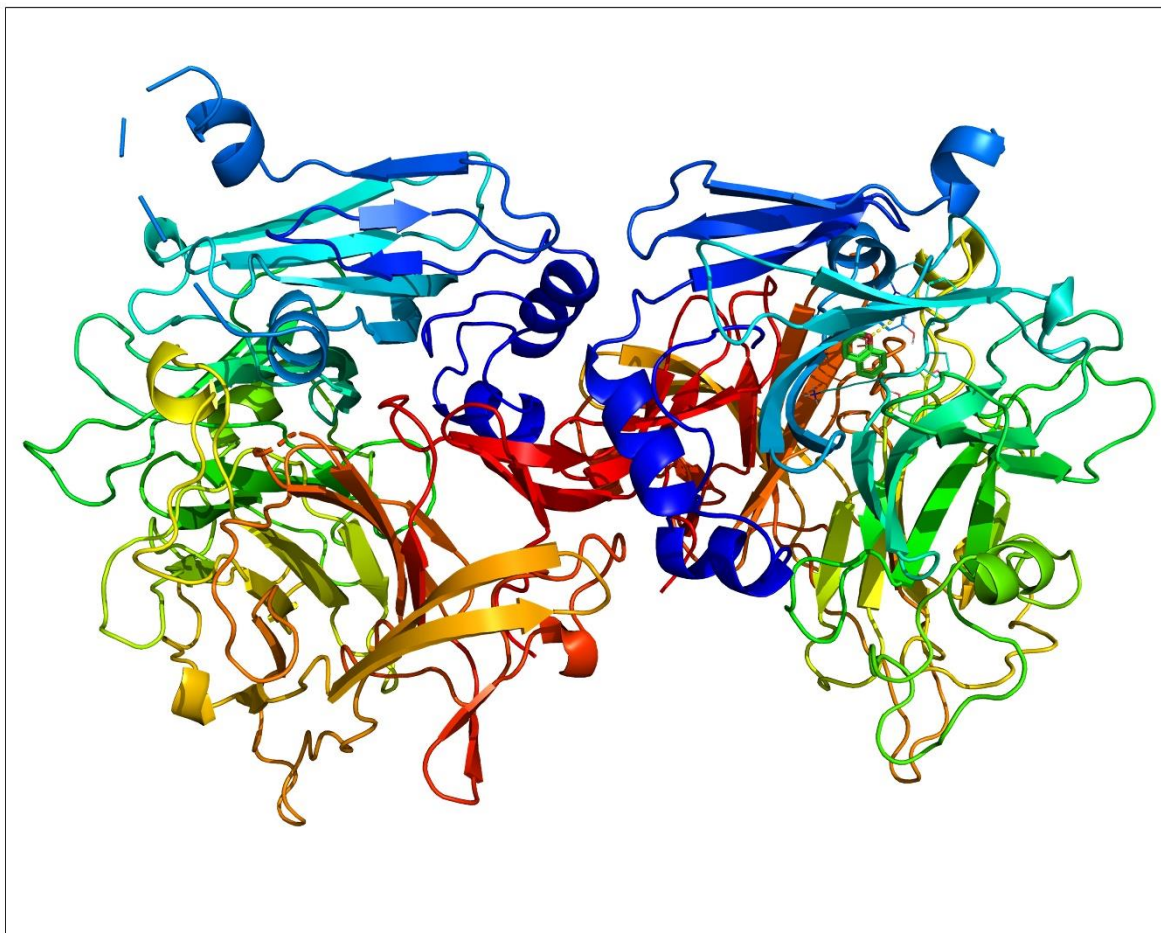

**Figure S3.** Molecular docked complex of coumarin with PtlY1 (3HX6).

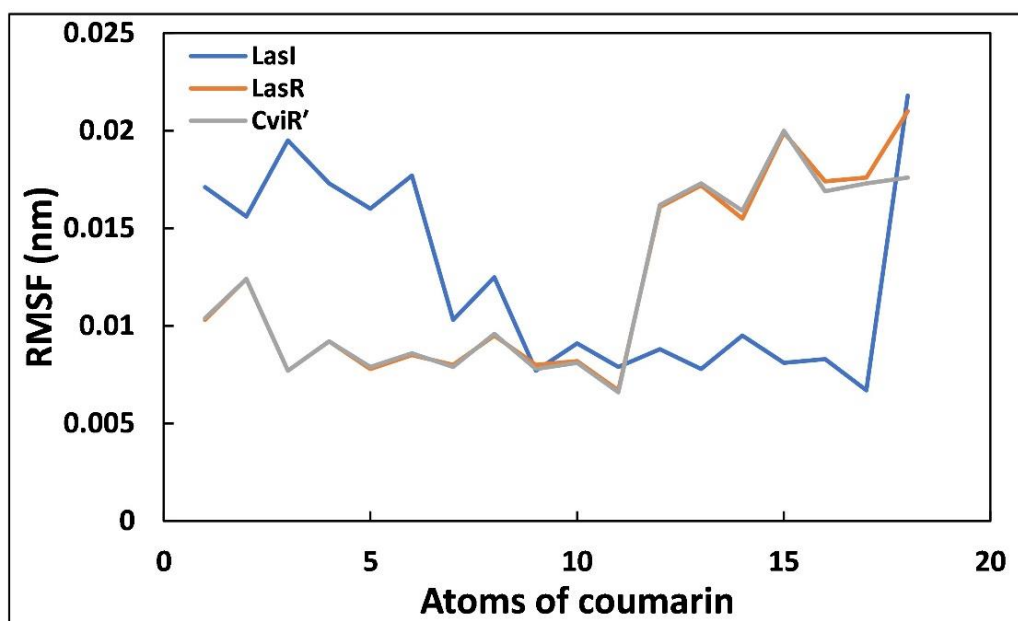

**Figure S4.** The average RMSF value of each atoms of coumarin during the MD simulation.

## Supplementary Tables

**Table S1.** Details of the chemicals used in this study.

| Name                                      | Catalogue Number | Purity | Company Name                | Country |
|-------------------------------------------|------------------|--------|-----------------------------|---------|
| Coumarin                                  | C4261            | ≥99%   | Sigma-Aldrich               | USA     |
| Azocasein                                 | A2765            | NA     | Sigma-Aldrich               | USA     |
| Elastin–Congo red (ECR)                   | E0502            | NA     | Sigma-Aldrich               | USA     |
| Trichloroacetic acid                      | RM7570           | ≥99%   | Hi-Media Laboratories       | India   |
| 2,3,5-triphenyltetrazolium chloride (TTC) | 65599            | 99%    | Sisco Research Laboratories | India   |
| Dimethyl Sulfoxide (DMSO)                 | BP2311           | ≥99.7% | Thermo Fisher Scientific    | India   |
| Chloroform                                | 38376005         | ≥99%   | Thermo Fisher Scientific    | India   |
| TRIS-hydrochloride (Tris-HCl)             | MB030            | 99%    | Hi-Media Laboratories       | India   |
| Orcinol monohydrate                       | MB242            | ≥98%   | Hi-Media Laboratories       | India   |
| Diethyl ether                             | 60-29-7          | ≥99%   | Thermo Fisher Scientific    | India   |
| Ethanol                                   | 100983           | ≥99.9% | Merck                       | India   |
| Crystal Violet                            | 28376            | NA     | Sisco Research Laboratories | India   |

NA: Information not available.

**Table S2.** Details of the grid of proteins/receptors used in this study.

| S. No. | Name of protein | Size of grid |    |    | Centre of grid |         |         |
|--------|-----------------|--------------|----|----|----------------|---------|---------|
|        |                 | x            | y  | z  | x              | y       | z       |
| 1.     | LasI            | 52           | 48 | 46 | 38.371         | -12.794 | -11.794 |
| 2.     | EsaI            | 48           | 58 | 52 | 22.9           | -3.461  | 15.731  |
| 3.     | LasR            | 40           | 44 | 52 | 24.865         | 11.477  | 77.671  |
| 4.     | PilY1           | 88           | 92 | 90 | 21.984         | -2.816  | 21.205  |
| 5.     | LasA            | 30           | 28 | 30 | 24.682         | 2.824   | -9.526  |
| 6.     | PilT            | 120          | 68 | 72 | -54.697        | 25.098  | 24.212  |
| 7.     | CviR            | 48           | 54 | 84 | 31.606         | 1.806   | 19.505  |
| 8.     | CviR'           | 52           | 46 | 48 | 14.982         | 18.069  | 45.838  |
| 9.     | PqsR            | 52           | 50 | 48 | -26.624        | 63.023  | 9.982   |
| 10.    | RhlR            | 56           | 80 | 74 | 26.079         | 27.547  | -23.006 |

**Table S3.** Effect of sub-MICs of coumarin on inhibition of virulence factors in *P. aeruginosa* PAO1.

| Coumarin concentration | Virulence factors production      |                                      |                                   |                                       |                                   |                                    |
|------------------------|-----------------------------------|--------------------------------------|-----------------------------------|---------------------------------------|-----------------------------------|------------------------------------|
|                        | Pyocyanin <sup>α</sup>            | Pyoverdin <sup>β</sup>               | Total protease <sup>γ</sup>       | Elastase activity (lasB) <sup>δ</sup> | Rhamnolipid <sup>Ω</sup>          | Swimming motility <sup>ε</sup>     |
| Control                | 6.58±0.49 <sup>a</sup>            | 761.51±26.12 <sup>a</sup>            | 0.61±0.02 <sup>a</sup>            | 0.42±0.01 <sup>a</sup>                | 0.88±0.02 <sup>a</sup>            | 88.66±1.15 <sup>a</sup>            |
| DMSO (0.5%)            | 6.69±0.35 <sup>a</sup>            | 752.59±17.39 <sup>a</sup>            | 0.60±0.02 <sup>a</sup>            | 0.42±0.01 <sup>a</sup>                | 0.86±0.04 <sup>a</sup>            | 89.33±1.15 <sup>a</sup>            |
| 31.25 μg/ml            | 4.50±0.68 <sup>b</sup><br>(31.70) | 660.58±27.23 <sup>b</sup><br>(13.25) | 0.53±0.02 <sup>a</sup><br>(12.76) | 0.39±0.01 <sup>ab</sup><br>(07.07)    | 0.74±0.04 <sup>b</sup><br>(15.48) | 48.33±3.05 <sup>b</sup><br>(45.48) |
| 62.5 μg/ml             | 3.76±0.37 <sup>b</sup><br>(42.79) | 501.57±22.98 <sup>c</sup><br>(34.13) | 0.42±0.02 <sup>b</sup><br>(31.73) | 0.36±0.01 <sup>b</sup><br>(13.83)     | 0.65±0.01 <sup>c</sup><br>(26.69) | 33.00±2.64 <sup>c</sup><br>(62.78) |
| 125 μg/ml              | 2.30±0.51 <sup>c</sup><br>(64.97) | 332.06±18.46 <sup>d</sup><br>(56.39) | 0.36±0.03 <sup>b</sup><br>(41.27) | 0.28±0.02 <sup>c</sup><br>(31.91)     | 0.54±0.02 <sup>d</sup><br>(39.09) | 21.66±2.51 <sup>d</sup><br>(75.56) |
| 250 μg/ml              | 0.83±0.14 <sup>d</sup><br>(87.25) | 228.07±43.90 <sup>e</sup><br>(70.05) | 0.14±0.03 <sup>c</sup><br>(76.07) | 0.17±0.03 <sup>d</sup><br>(58.64)     | 0.45±0.03 <sup>d</sup><br>(48.94) | 16.66±4.04 <sup>d</sup><br>(81.20) |

The data is presented as average±SD of three replicates. For analysis of statistical significance, one-way ANOVA was performed using Tukey's test at significance level of 0.05. Different letters above SD represent different significant groups at p-value=0.05 and are in descending order of values starting from letter "a". Values in parenthesis are the percent inhibition.

<sup>α</sup>Pyocyanin concentrations were expressed as μg/ml of culture supernatant.

<sup>β</sup>Pyoverdin results are expressed in fluorescence intensity (arbitrary unit).

<sup>γ</sup>Total protease activity is expressed as the absorbance at 400 nm.

<sup>δ</sup>Elastase activity is expressed as the absorbance at 495 nm.

<sup>Ω</sup>Rhamnolipid is expressed as the absorbance at 421 nm.

<sup>ε</sup>Swimming motility is expressed as swarm diameter in mm.

**Table S4.** Binding energies of top five poses for the interaction of coumarin with different proteins obtained using AutoDock Vina.

| S. No. | PDB ID | Protein name | Binding energy (kcal mol <sup>-1</sup> ) |         |          |         |        |
|--------|--------|--------------|------------------------------------------|---------|----------|---------|--------|
|        |        |              | Pose I                                   | Pose II | Pose III | Pose IV | Pose V |
| 1.     | 1RO5   | LasI         | -5.7                                     | -5.6    | -5.5     | -5.5    | -5.4   |
| 2.     | 1KZF   | EsaI         | -6.6                                     | -6.3    | -6.3     | -6.2    | -5.9   |
| 3.     | 2UV0   | LasR         | -8.1                                     | -7.6    | -7.5     | -7.4    | -7.4   |
| 4.     | 3IT7   | LasA         | -7.5                                     | -6.6    | -6.5     | -6.0    | -5.9   |
| 5.     | 3QP5   | CviR         | -7.7                                     | -7.6    | -6.9     | -6.6    | -6.5   |
| 6.     | 3QP1   | CviR'        | -7.7                                     | -7.3    | -7.1     | -7.1    | -6.9   |
| 7.     | 4JVI   | PqsR         | -6.5                                     | -6.4    | -5.8     | -5.7    | -5.7   |
| 8.     | 3JVV   | PilT         | -6.3                                     | -6.1    | -6.1     | -6.1    | -5.9   |
| 9.     | 3HX6   | PilY1        | -6.3                                     | -6.2    | -6.2     | -6.0    | -5.9   |
| 10.    |        | RhlR         | -6.4                                     | -6.2    | -6.2     | -6.0    | -6.0   |

**Table S5.** RMSD, R<sub>g</sub>, and SASA of protein only, coumarin-protein complex, and coumarin only calculated in MD simulation.

| Name of Proteins | Proteins/complexes     | Proteins      |                     |                         |
|------------------|------------------------|---------------|---------------------|-------------------------|
|                  |                        | RMSD (nm)     | R <sub>g</sub> (nm) | SASA (nm <sup>2</sup> ) |
| <b>LasI</b>      | LasI only              | 0.263±0.039   | 1.609±0.010         | 104.746±2.377           |
|                  | LasI-coumarin complex  | 0.272±0.030*  | 1.580±0.011*        | 102.032±2.307*          |
|                  | Coumarin only          | 0.012±0.002*# | 0.227±0.001*#       | 003.153±0.168*#         |
| <b>LasR</b>      | LasR only              | 0.137±0.024   | 1.494±0.007         | 90.682±1.623            |
|                  | LasR-coumarin complex  | 0.137±0.016*  | 1.483±0.007*        | 89.498±1.598*           |
|                  | Coumarin only          | 0.012±0.002*# | 0.226±0.001*#       | 03.138±0.161*#          |
| <b>CviR'</b>     | CviR' only             | 0.167±0.034   | 1.572±0.012         | 98.630±1.908            |
|                  | CviR'-coumarin complex | 0.208±0.031*  | 1.565±0.011*        | 97.660±2.002*           |
|                  | Coumarin only          | 0.014±0.003*# | 0.227±0.001*#       | 03.155±0.168*#          |

RMSD: Root-mean square deviation, R<sub>g</sub>: Radius of gyration, SASA: Solvent accessible surface area.  
\* indicates significantly different from protein only at p < 0.05. # indicates significantly different from protein-coumarin complex at p # 0.05.
